# Supplementary material for: A Chromosome-Scale Assembly of the Bactrocera cucurbitae Genome Provides Insight to the Genetic Basis of white pupae
Source: PubMed Central journal article supplement (PMC5473769; doi:10.1534/g3.117.040170), 2017-04-20

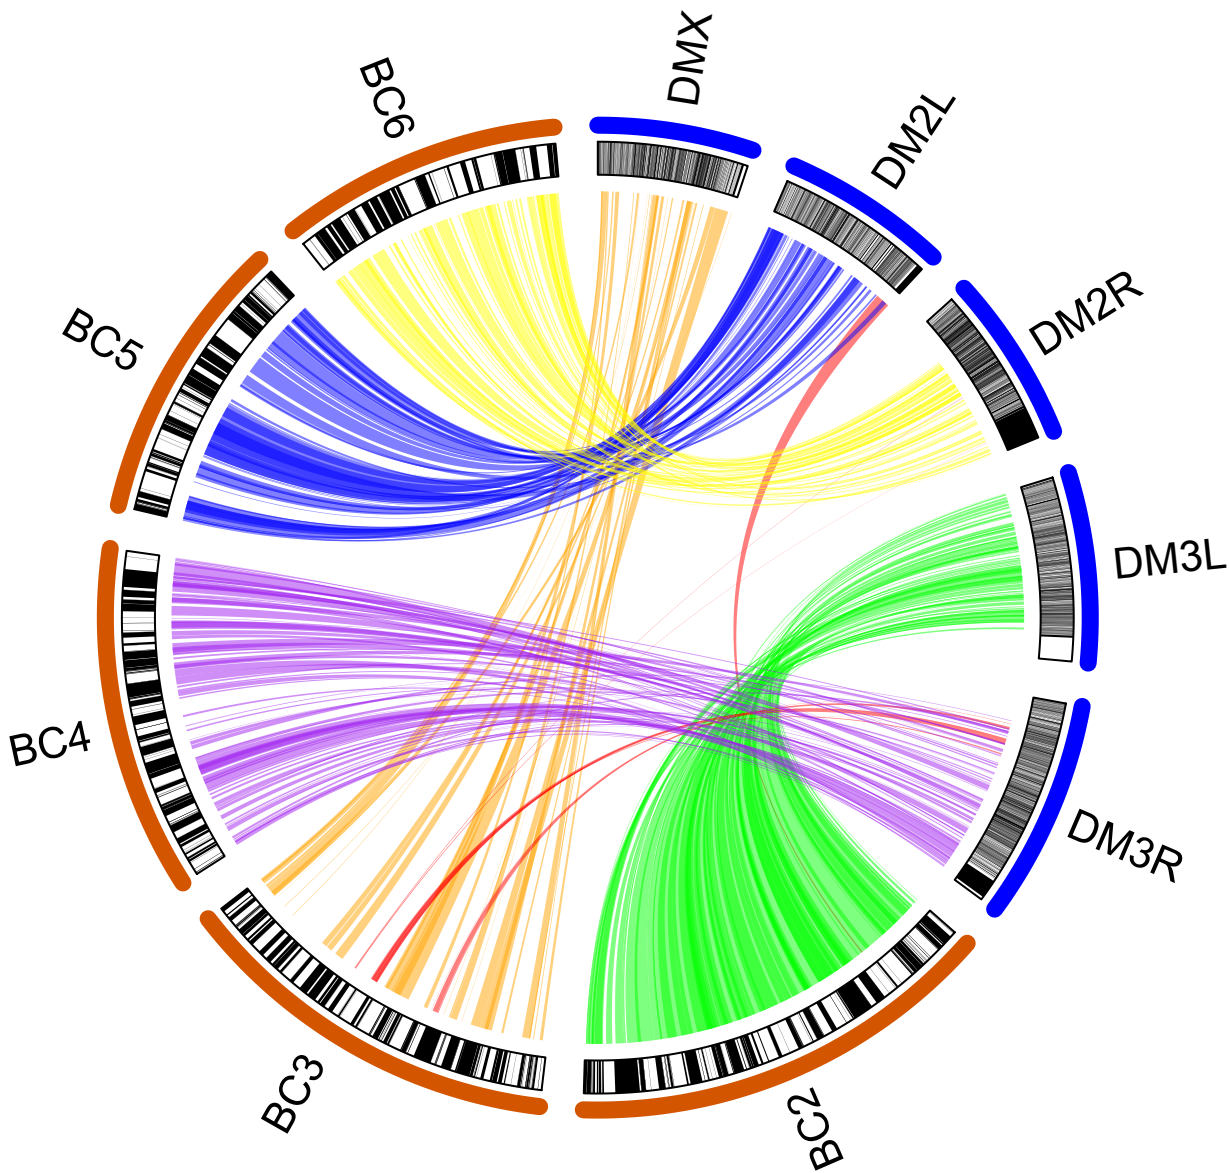

Supplement: 1927FigureS6.pdf [file 1927FigureS6.pdf]
