# Supplementary material for: A Chromosome-Scale Assembly of the Bactrocera cucurbitae Genome Provides Insight to the Genetic Basis of white pupae
Source: PubMed Central journal article supplement (PMC5473769; doi:10.1534/g3.117.040170), 2017-04-20
Supplement: 1927TableS1.pdf [file 1927TableS1.pdf]

**Table S1. Data sources for species used in phylogenetic analyses.**

| <b>Species</b>             | <b>Version</b> | <b>Source</b>                                                                                       |
|----------------------------|----------------|-----------------------------------------------------------------------------------------------------|
| <i>B. dorsalis</i>         | 1.1            | <a href="ftp://ftp.ncbi.nlm.nih.gov/genomes/refseq/">ftp://ftp.ncbi.nlm.nih.gov/genomes/refseq/</a> |
| <i>B. oleae</i>            | 2.0            | <a href="https://i5k.nal.usda.gov">https://i5k.nal.usda.gov</a>                                     |
| <i>C. capitata</i>         | 1.1            | <a href="ftp://ftp.ncbi.nlm.nih.gov/genomes/refseq/">ftp://ftp.ncbi.nlm.nih.gov/genomes/refseq/</a> |
| <i>M. domestica</i>        | 1.1            | <a href="https://www.vectorbase.org/">https://www.vectorbase.org/</a>                               |
| <i>D. melanogaster</i>     | 6.08           | <a href="http://flybase.org/">http://flybase.org/</a>                                               |
| <i>A. gambiae</i>          | 4.3            | <a href="https://www.vectorbase.org/">https://www.vectorbase.org/</a>                               |
| <i>A. aegypti</i>          | 3.3            | <a href="https://www.vectorbase.org/">https://www.vectorbase.org/</a>                               |
| <i>C. quinquefasciatus</i> | 2.2            | <a href="https://www.vectorbase.org/">https://www.vectorbase.org/</a>                               |
| <i>M. sexta</i>            | 1.0            | <a href="https://i5k.nal.usda.gov">https://i5k.nal.usda.gov</a>                                     |
| <i>B. mori</i>             | 1.29           | <a href="http://metazoa.ensembl.org/">http://metazoa.ensembl.org/</a>                               |
| <i>T. castaneum</i>        | 3.0            | <a href="https://i5k.nal.usda.gov">https://i5k.nal.usda.gov</a>                                     |
| <i>A. mellifera</i>        | 3.2            | <a href="http://hymenopteragenome.org/beebase/">http://hymenopteragenome.org/beebase/</a>           |
| <i>S. invicta</i>          | 2.2.3          | <a href="http://hymenopteragenome.org/solenopsis/">http://hymenopteragenome.org/solenopsis/</a>     |
| <i>P. humanus</i>          | 2.1            | <a href="https://www.vectorbase.org/">https://www.vectorbase.org/</a>                               |
| <i>A. pisum</i>            | 2.1b           | <a href="http://bipaa.genouest.org/is/aphidbase/">http://bipaa.genouest.org/is/aphidbase/</a>       |
| <i>C. lectularius</i>      | 1.2            | <a href="https://i5k.nal.usda.gov">https://i5k.nal.usda.gov</a>                                     |
| <i>D. pulex</i>            | 1.1            | <a href="http://genome.jgi.doe.gov/">http://genome.jgi.doe.gov/</a>                                 |
