# Supplementary material for: A Chromosome-Scale Assembly of the Bactrocera cucurbitae Genome Provides Insight to the Genetic Basis of white pupae
Source: PubMed Central journal article supplement (PMC5473769; doi:10.1534/g3.117.040170), 2017-04-20
Supplement: 1927TableS2.pdf [file 1927TableS2.pdf]

**Table S2. Read depth for each individual in ddRAD sequencing library.**

| <b>Generation</b> | <b>ID</b> | <b>Total reads</b> | <b>No RAD</b> | <b>Low quality</b> | <b>Retained</b> |
|-------------------|-----------|--------------------|---------------|--------------------|-----------------|
| F2                | BF_6      | 257241             | 1034          | 81                 | 256126          |
| F2                | BM_6      | 459646             | 2363          | 167                | 457116          |
| F3                | BF_6_6    | 920937             | 873           | 329                | 919735          |
| F3                | BM_6_6    | 577261             | 238           | 213                | 576810          |
| F4                | BF_6_6_2  | 992869             | 2462          | 365                | 990042          |
| F4                | BF_6_6_15 | 567745             | 2056          | 222                | 565467          |
| F4                | BF_6_8_7  | 619941             | 980           | 226                | 618735          |
| F4                | BF_6_6_17 | 390532             | 1190          | 133                | 389209          |
| F4                | BF_6_6_19 | 658329             | 174           | 234                | 657921          |
| F4                | BF_6_6_20 | 587035             | 1305          | 225                | 585505          |
| F4                | BF_6_6_29 | 726608             | 327           | 254                | 726027          |
| F4                | BF_6_6_31 | 675918             | 978           | 268                | 674672          |
| F4                | BM_6_6_26 | 810476             | 2135          | 308                | 808033          |
| F4                | BF_6_6_23 | 336018             | 2166          | 144                | 333708          |
| F4                | BM_6_6_6  | 285099             | 8850          | 90                 | 276159          |
| F4                | BF_6_6_18 | 464788             | 617           | 154                | 464017          |
| F4                | BF_6_6_30 | 1008677            | 2417          | 360                | 1005900         |
| F4                | BM_6_6_3  | 271463             | 958           | 101                | 270404          |
| F4                | BF_6_6_34 | 635728             | 459           | 239                | 635030          |
| F4                | BM_6_6_25 | 455262             | 185           | 176                | 454901          |
| F4                | BF_6_6_22 | 712681             | 1118          | 257                | 711306          |
| F4                | BM_6_6_24 | 664314             | 1595          | 256                | 662463          |
| F4                | BF_6_6_1  | 867266             | 2173          | 337                | 864756          |
| F4                | BM_6_6_11 | 421880             | 1978          | 182                | 419720          |
| F4                | BF_6_6_33 | 707791             | 1926          | 245                | 705620          |
| F4                | BM_6_6_1  | 719852             | 191           | 271                | 719390          |
| F4                | BM_6_6_22 | 398612             | 113           | 128                | 398371          |
| F4                | BM_6_6_5  | 598864             | 265           | 203                | 598396          |
| F4                | BM_6_6_21 | 1049830            | 576           | 397                | 1048857         |
| F4                | BF_6_6_32 | 271851             | 3459          | 93                 | 268299          |
| F4                | BM_6_6_4  | 506370             | 173           | 193                | 506004          |
| F4                | WF_6_6_1  | 1193211            | 1266          | 466                | 1191479         |
| F4                | WF_6_6_9  | 879730             | 5618          | 332                | 873780          |
| F4                | WM_6_6_2  | 549573             | 762           | 203                | 548608          |
| F4                | WM_6_6_1  | 852240             | 6207          | 318                | 845715          |
| F4                | WM_6_6_5  | 1148930            | 4070          | 431                | 1144429         |
| F4                | WF_6_6_6  | 1335541            | 1118          | 517                | 1333906         |
| F4                | WM_6_6_3  | 1498731            | 443           | 506                | 1497782         |
| F4                | WM_6_6_4  | 991419             | 1579          | 375                | 989465          |
| F4                | WF_6_6_8  | 754284             | 2263          | 280                | 751741          |

| Generation | ID         | Total reads | No RAD | Low quality | Retained |
|------------|------------|-------------|--------|-------------|----------|
| F3         | BF_6_8     | 585002      | 696    | 204         | 584102   |
| F3         | BM_6_8     | 152780      | 2114   | 55          | 150611   |
| F4         | BM_6_8_12  | 233556      | 372    | 84          | 233100   |
| F4         | BM_6_8_22  | 586604      | 1877   | 246         | 584481   |
| F4         | BF_6_8_1   | 1063928     | 2240   | 369         | 1061319  |
| F4         | BF_6_8_3   | 660497      | 1969   | 220         | 658308   |
| F4         | BF_6_8_4   | 313104      | 102    | 101         | 312901   |
| F4         | BM_6_8_2   | 171179      | 290    | 58          | 170831   |
| F4         | BM_6_8_3   | 169426      | 195    | 53          | 169178   |
| F4         | BM_6_8_17  | 819747      | 569    | 314         | 818864   |
| F4         | BM_6_8_19  | 608368      | 1604   | 222         | 606542   |
| F4         | BM_6_8_20  | 671369      | 2277   | 253         | 668839   |
| F4         | BM_6_8_21  | 736391      | 2174   | 318         | 733899   |
| F4         | BM_6_8_4   | 233806      | 2576   | 79          | 231151   |
| F4         | BM_6_8_15  | 123901      | 1023   | 41          | 122837   |
| F4         | BM_6_8_18  | 537384      | 1368   | 199         | 535817   |
| F4         | BF_6_8_2   | 271504      | 1329   | 85          | 270090   |
| F4         | BM_6_8_1   | 400589      | 208    | 164         | 400217   |
| F4         | BM_6_8_7   | 286677      | 1406   | 118         | 285153   |
| F4         | BM_6_8_11  | 498269      | 183    | 193         | 497893   |
| F4         | BM_6_8_8   | 506698      | 829    | 190         | 505679   |
| F4         | BM_6_8_13  | 787498      | 3065   | 318         | 784115   |
| F4         | WM_6_8_3   | 624567      | 2332   | 221         | 622014   |
| F4         | WM_6_8_4   | 764134      | 7676   | 262         | 756196   |
| F4         | WF_6_8_1   | 698859      | 938    | 284         | 697637   |
| F4         | WM_6_8_2   | 572046      | 3438   | 220         | 568388   |
| F4         | WM_6_8_5   | 998850      | 838    | 351         | 997661   |
| F3         | BF_6_16    | 601381      | 2975   | 210         | 598196   |
| F3         | BM_6_16    | 535117      | 581    | 234         | 534302   |
| F4         | BF_6_16_4  | 332553      | 213    | 127         | 332213   |
| F4         | BF_6_16_5  | 211715      | 135    | 72          | 211508   |
| F4         | BF_6_16_9  | 328991      | 1161   | 118         | 327712   |
| F4         | BM_6_16_1  | 523914      | 1678   | 208         | 522028   |
| F4         | BF_6_16_10 | 763222      | 1093   | 292         | 761837   |
| F4         | BM_6_16_4  | 667504      | 2624   | 247         | 664633   |
| F4         | BM_6_16_2  | 543718      | 2051   | 230         | 541437   |
| F4         | BM_6_16_3  | 516943      | 168    | 208         | 516567   |
| F4         | WF_6_16_2  | 648894      | 220    | 258         | 648416   |
| F4         | WM_6_16_2  | 869087      | 540    | 320         | 868227   |
| F4         | WM_6_16_3  | 667161      | 639    | 266         | 666256   |
| F4         | WF_6_16_3  | 665157      | 3644   | 249         | 661264   |

| Generation    | ID         | Total reads | No RAD | Low quality | Retained |
|---------------|------------|-------------|--------|-------------|----------|
| F3            | BF_6_44    | 416334      | 3055   | 165         | 413114   |
| F3            | BM_6_44    | 1243359     | 1948   | 470         | 1240941  |
| F4            | BF_6_44_11 | 1207258     | 324    | 416         | 1206518  |
| F4            | BF_6_44_10 | 1056998     | 1157   | 405         | 1055436  |
| F4            | BM_6_44_4  | 794340      | 6835   | 311         | 787194   |
| F4            | BF_6_44_2  | 875330      | 1950   | 331         | 873049   |
| F4            | BF_6_44_4  | 890337      | 4494   | 343         | 885500   |
| F4            | BF_6_44_7  | 945891      | 5838   | 347         | 939706   |
| F4            | BF_6_44_12 | 610103      | 1020   | 219         | 608864   |
| F4            | BF_6_44_8  | 459633      | 262    | 192         | 459179   |
| F4            | BM_6_44_5  | 859808      | 2003   | 297         | 857508   |
| F4            | BM_6_44_12 | 710576      | 1827   | 262         | 708487   |
| F4            | BF_6_44_1  | 930144      | 797    | 347         | 929000   |
| F4            | BF_6_44_3  | 1028410     | 764    | 355         | 1027291  |
| F4            | BM_6_44_11 | 649238      | 4135   | 201         | 644902   |
| F4            | BF_6_44_6  | 1029054     | 2691   | 357         | 1026006  |
| F4            | BF_6_44_9  | 1109007     | 2817   | 398         | 1105792  |
| F4            | BM_6_44_7  | 640525      | 204    | 240         | 640081   |
| F4            | WF_6_44_10 | 1005502     | 546    | 383         | 1004573  |
| F4            | WM_6_44_1  | 1530925     | 906    | 645         | 1529374  |
| F4            | WM_6_44_3  | 1033978     | 742    | 412         | 1032824  |
| F4            | WM_6_44_5  | 861173      | 2732   | 286         | 858155   |
| F4            | WF_6_44_3  | 830991      | 2911   | 317         | 827763   |
| F4            | WF_6_44_4  | 870330      | 2670   | 327         | 867333   |
| F4            | WM_6_44_2  | 275383      | 4266   | 96          | 271021   |
| F4            | WF_6_44_1  | 167672      | 1905   | 50          | 165717   |
| F4            | WF_6_44_9  | 331384      | 1064   | 104         | 330216   |
| F4            | WF_6_44_6  | 138102      | 1057   | 41          | 137004   |
| F4            | WF_6_44_7  | 301320      | 240    | 102         | 300978   |
| F4            | WF_6_44_8  | 440633      | 737    | 156         | 439740   |
| Parental line | RmelF_1    | 990384      | 4610   | 356         | 985418   |
| Parental line | RmelF_3    | 1552116     | 3107   | 571         | 1548438  |
| Parental line | RmelF_4    | 996939      | 2769   | 357         | 993813   |
| Parental line | RmelF_8    | 1021512     | 484    | 408         | 1020620  |
| Parental line | RmelF_2    | 1379093     | 3409   | 527         | 1375157  |
| Parental line | RmelF_7    | 772443      | 304    | 291         | 771848   |
| Parental line | RmelM_2    | 713330      | 1684   | 277         | 711369   |
| Parental line | RmelM_3    | 1326194     | 4284   | 492         | 1321418  |
| Parental line | RmelM_7    | 520617      | 3585   | 199         | 516833   |
| Parental line | RmelM_8    | 492184      | 14295  | 203         | 477686   |
| Parental line | RmelM_1    | 407504      | 1221   | 139         | 406144   |
| Parental line | RmelM_4    | 557950      | 6361   | 213         | 551376   |

| Generation    | ID         | Total reads | No RAD | Low quality | Retained |
|---------------|------------|-------------|--------|-------------|----------|
| F3            | BF_6_58    | 656302      | 1000   | 238         | 655064   |
| F3            | BM_6_58    | 424382      | 330    | 157         | 423895   |
| F4            | BF_6_58_8  | 333669      | 152    | 123         | 333394   |
| F4            | BF_6_58_9  | 234633      | 1035   | 70          | 233528   |
| F4            | BM_6_58_8  | 972221      | 4689   | 332         | 967200   |
| F4            | BF_6_58_3  | 882382      | 2973   | 328         | 879081   |
| F4            | BF_6_58_11 | 770250      | 7073   | 281         | 762896   |
| F4            | BF_6_58_15 | 855096      | 1410   | 323         | 853363   |
| F4            | BM_6_58_1  | 702028      | 4797   | 232         | 696999   |
| F4            | BM_6_58_2  | 1205662     | 1763   | 478         | 1203421  |
| F4            | BM_6_58_6  | 701172      | 620    | 252         | 700300   |
| F4            | BF_6_58_2  | 795618      | 673    | 303         | 794642   |
| F4            | BF_6_58_4  | 573935      | 1636   | 206         | 572093   |
| F4            | BF_6_58_5  | 768760      | 1693   | 284         | 766783   |
| F4            | BF_6_58_6  | 812962      | 2074   | 325         | 810563   |
| F4            | BF_6_58_7  | 492834      | 2761   | 187         | 489886   |
| F4            | BF_6_58_10 | 849751      | 1924   | 298         | 847529   |
| F4            | BF_6_58_14 | 266370      | 142    | 92          | 266136   |
| F4            | BF_6_58_17 | 483212      | 279    | 169         | 482764   |
| F4            | BM_6_58_12 | 465838      | 413    | 174         | 465251   |
| F4            | BF_6_58_1  | 679542      | 797    | 249         | 678496   |
| F4            | BF_6_58_12 | 831428      | 3734   | 278         | 827416   |
| F4            | BF_6_58_16 | 665238      | 245    | 265         | 664728   |
| F4            | BM_6_58_7  | 623998      | 574    | 235         | 623189   |
| F4            | BM_6_58_3  | 274549      | 5037   | 109         | 269403   |
| F4            | BM_6_58_4  | 708251      | 988    | 237         | 707026   |
| F4            | BM_6_58_9  | 679031      | 6084   | 270         | 672677   |
| F4            | BM_6_58_10 | 565473      | 4293   | 216         | 560964   |
| F4            | BM_6_58_11 | 722686      | 1077   | 240         | 721369   |
| F4            | WF_6_58_3  | 983546      | 361    | 385         | 982800   |
| F4            | WM_6_58_1  | 790121      | 1449   | 288         | 788384   |
| F4            | WM_6_58_3  | 571854      | 2557   | 213         | 569084   |
| Parental line | T1F_3      | 1131896     | 1998   | 455         | 1129443  |
| Parental line | T1F_6      | 938772      | 765    | 346         | 937661   |
| Parental line | T1F_8      | 1598954     | 1474   | 540         | 1596940  |
| Parental line | T1F_1      | 1874444     | 3732   | 691         | 1870021  |
| Parental line | T1F_4      | 1444709     | 2718   | 521         | 1441470  |
| Parental line | T1F_5      | 1208360     | 3994   | 437         | 1203929  |
| Parental line | T1F_7      | 960353      | 9035   | 331         | 950987   |
| Parental line | T1M_3      | 1624934     | 4019   | 577         | 1620338  |
| Parental line | T1M_4      | 1215001     | 601    | 427         | 1213973  |
| Parental line | T1M_1      | 1045652     | 392    | 392         | 1044868  |
| Parental line | T1M_2      | 1315813     | 1169   | 473         | 1314171  |
