# Supplementary material for: A Chromosome-Scale Assembly of the Bactrocera cucurbitae Genome Provides Insight to the Genetic Basis of white pupae
Source: PubMed Central journal article supplement (PMC5473769; doi:10.1534/g3.117.040170), 2017-04-20
Supplement: 1927TableS4.pdf [file 1927TableS4.pdf]

**Table S4. Regression between position of gene orthologs in *D. melanogaster* and *B. cucurbitae***

| <b>Muller element</b> | <b><i>B. cucurbitae</i> chr.</b> | <b><i>D. melanogaster</i> chr.</b> | <b><math>R^2</math></b> | <b>p-value</b> |
|-----------------------|----------------------------------|------------------------------------|-------------------------|----------------|
| A                     | 3                                | X                                  | 0.04                    | < 1e-4         |
| B                     | 5                                | 2L                                 | 0.08                    | < 1e-4         |
| C                     | 6                                | 2R                                 | 0.01                    | < 1e-4         |
| D                     | 2                                | 3L                                 | 0.23                    | < 1e-4         |
| E                     | 4                                | 3R                                 | 0.05                    | < 1e-4         |
