# Supplementary material for: A Chromosome-Scale Assembly of the Bactrocera cucurbitae Genome Provides Insight to the Genetic Basis of white pupae
Source: G3 (Bethesda). 2017 Apr 20;7(6):1927–40. doi: 10.1534/g3.117.040170 (PMC5473769; doi:10.1534/g3.117.040170)
Supplement: Supplementary file 12 [file 1927TableS3.pdf]

**Table S3. Genes related to cuticle structure and sclerotization within region with significant LOD score**

| <b>Gene ID</b> | <b>Gene product</b>                    |
|----------------|----------------------------------------|
| LOC105210517   | pupal cuticle protein 36               |
| LOC105213937   | chitinase-like protein Idgf4           |
| LOC105216017   | pupal cuticle protein C1B-like         |
| LOC105216018   | cuticle protein 12.5-like              |
| LOC105216019   | cuticle protein 16.5%2C isoform B-like |
| LOC105216022   | cuticle protein 19.8-like              |
| LOC105216023   | cuticle protein 38-like                |
| LOC105216028   | cuticle protein 16.5%2C isoform A-like |
| LOC105216029   | cuticle protein 16.5%2C isoform B-like |
| LOC105218487   | chitinase-3-like protein 2             |
| LOC105218843   | pupal cuticle protein Edg-78E          |
